# Supplementary material for: A quinine-based quaternized polymer: a potent scaffold with bactericidal properties without resistance
Source: Royal Society of Chemistry journal article supplement (doi:10.1039/d0py01751e), 2021-01-01
Supplement: d0py01751e1.pdf [file d0py01751e1.pdf]

## Supporting Information

# Quinine-based quaternized polymer: A potent scaffold with bactericidal properties without resistance

Huan-Huan Ding,<sup>a</sup> Mu-Han Zhao,<sup>a</sup> Le Zhai,<sup>b</sup> Jian-Bin Zhen,<sup>a</sup> Le-Yun Sun,<sup>a</sup> Jia-Zhu Chigan,<sup>a</sup>  
Cheng Chen,<sup>a</sup> Jia-Qi Li,<sup>a</sup> Han Gao,<sup>a</sup> and Ke-Wu Yang<sup>\*a</sup>

## Proton Nuclear Magnetic Resonance (<sup>1</sup>H NMR)

The NMR spectrum was recorded on a Bruker AV 400 MHz spectrometer, using tetramethylsilane as an internal standard and DMSO-d<sub>6</sub> as solvent. The sample concentration was ca. 10 mg/mL.

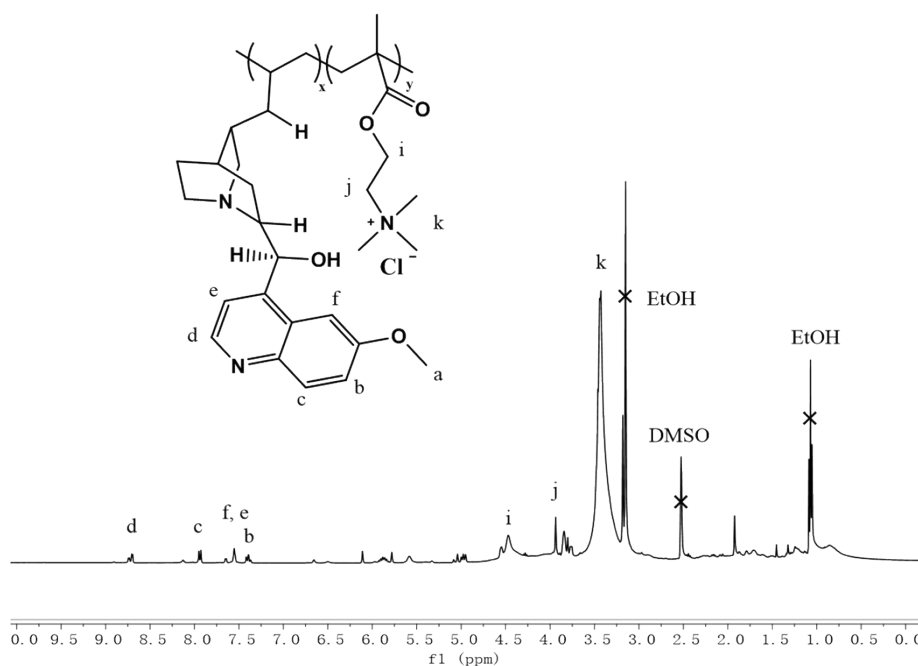

Fig. S1  $^1\text{H}$  NMR spectrum of QMTA in  $\text{DMSO-d}_6$

### Gel permeation chromatography (GPC)

The molecular weight and polydispersity index of polymer were determined on a gel permeation chromatography (GPC) instrument equipped with two Plgel 5 mm Mixed-D column. With aqueous solution used as the eluent with a flow rate of 1 mL/min, the polymer was centrifuged and filtered prior to experiments.

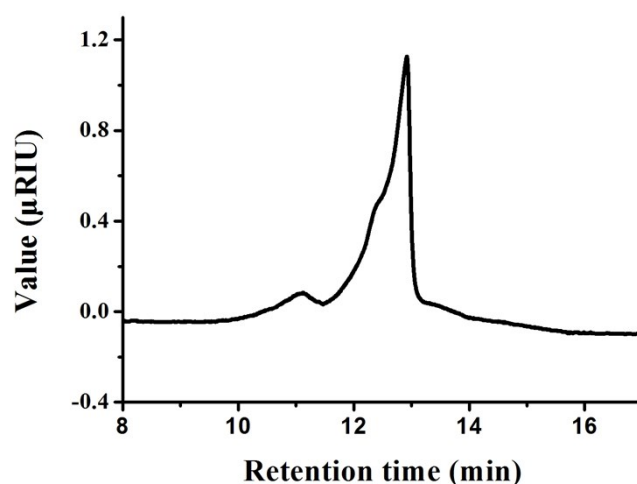

Fig. S2 The GPC trace of QMTA

Table S1 The GPC value of QMTA in aqueous solution

| Polymer   | QMTA  |
|-----------|-------|
| $M_w$     | 46441 |
| $M_w/M_n$ | 1.24  |

### Formulation of M9 medium

$\text{MgSO}_4$  (1 M),  $\text{CaCl}_2$  (1 M) and  $\text{ZnSO}_4$  (1 M) were dissolved in double distilled water (10 mL), respectively, and autoclaved for later use. 5×M9 salt solution, including  $\text{Na}_2\text{PO}_4 \cdot 7\text{H}_2\text{O}$ ,  $\text{KH}_2\text{PO}_4$ ,  $\text{NaCl}$  and  $\text{NH}_4\text{Cl}$ , was dissolved in 200 ml of double distilled water and sterilized at 121 °C for 15 min. Then a 20% glucose solution was prepared with sterilized at 115 °C for 15 min.

Aseptic preparation of M9 medium (1000 mL): 5×M9 salt solution (200 mL), 1 M  $\text{MgSO}_4$  (2 mL), 1 M  $\text{CaCl}_2$  (0.1 mL), 1 M  $\text{ZnSO}_4$  (0.1 mL) and 20% glucose solution (20

mL) were mixed, and the sterilized double distilled water was added to the mixture to reach a total volume of 1000 mL.

### **Scanning electron microscopy (SEM)**

The morphology of the microorganisms before and after treatment with polymer was observed using a field emission SEM (SU8010) operated at an accelerating voltage of 3.0 keV. Samples were treated with gold before observation.

### **Zeta potential**

Zeta potentials were measured on a Water Nano-ZS 90 Nanosizer (Malvern Instrument) at a fixed scattering angle of 90° at room temperature.
